# Supplementary material for: Genome survey sequencing and identification of genomic SSR markers for Rhododendron micranthum
Source: Oxford University Press journal article supplement (doi:10.1042/bsr20200988), 2020-06-01
Supplement: bsr-2020-0988_supp.pdf [file bsr-2020-0988_supp.pdf]

**Table S1 Information of the 71 pairs of SSR primers in *R.micranthum***

| Primer No. | Primer sequence (5'→3')                            | Motif  | Expected size (bp) | Ta (°C) |
|------------|----------------------------------------------------|--------|--------------------|---------|
| RM-1       | F:ACCTCACCCCTTCCTCAACT R:CGTCAAATGGGAAGAAAGGA      | (TTC)9 | 218                | 55      |
| RM-2       | F:GGATCCCCATCTTTTTCTTCA R:GATTCTCCTCGAGCAACAG      | (TCA)9 | 193                | 54      |
| RM-4       | F:GAAGGTCCGCATTTTAGCAA R:CTCACCCAGGTTGTATTCCG      | (ATT)9 | 169                | 54      |
| RM-6       | F:CATGAAGGCAATTAGCCAAAA<br>R:TCTGAAACATAACCGAAGGGG | (AAG)9 | 272                | 53      |
| RM-7       | F:CAATCCACCACATGACGAAG<br>R:GGGTTATGGGAACAGAAGCA   | (ACC)9 | 240                | 54      |
| RM-8       | F:GGGAACCCCTCTGTTGAAAT R:GAAACCCTAACCGGTCCTTC      | (AAG)9 | 248                | 55      |
| RM-9       | F:AGTTGGCCGTTCATAAGGTG R:TGGCAATTGCTATTGATGGA      | (ACA)9 | 141                | 53      |
| RM-10      | F:GGCAAGAGTGGCATGAAAGT<br>R:TGAAGGATTGCAAATTGTCTT  | (CTT)9 | 136                | 54      |
| RM-15      | F:TCAATCATCGTCTGCCATA R:GGTATGTCAACAACGGCAAA       | (TGT)9 | 272                | 53      |
| RM-16      | F:GTGTTGGAATGGGTCACGTA R:CACCTCGGCCCTAACTATTG      | (GAA)9 | 175                | 55      |
| RM-17      | F:CTTGATCATTGGCCCACTC R:GTGACCTTCCACCAAGCAAT       | (TTA)9 | 176                | 55      |
| RM-18      | F:TATTGCCCTTTTGTCTTTG R:GAATTTGGGGATGAGGTGAA       | (CAG)9 | 129                | 53      |
| RM-19      | F:TACAATGCCGTCTTCTGCTG R:TTGTGAGAAGGAAAAACCCG      | (CCG)9 | 177                | 54      |
| RM-20      | F:CCGTTCTCGCTCGTTTTAT R:TTGGCAATGCTAGCCTTTTT       | (AAT)9 | 279                | 54      |
| RM-22      | F:TTAAACCCTTATGCGGCAAC R:CACAACGGTGAAAACCAAGTG     | (CCT)9 | 210                | 54      |
| RM-23      | F:CCCGGGACCAAGTTTTTATT R:CGTCAAAAAGCGGAGAGTTC      | (TTA)9 | 259                | 53      |
| RM-24      | F:TTCGCCTACCTTCCAATGTC R:CTTCACAACCACCACCACAG      | (AAG)9 | 165                | 56      |
| RM-25      | F:ACCAACGAAATGATCAAGGC<br>R:CGTGACAAGTGGTATCCGTG   | (TTA)9 | 188                | 55      |
| RM-26      | F:TGAAGGGCATTTAAGAACCG<br>R:AGTGGTGGGACTCGTACAGC   | (ACC)9 | 215                | 56      |
| RM-27      | F:CTTTGGGTTTCGACTTGAGG<br>R:TCGATAACAGGTCAGTTCGAC  | (TTG)9 | 168                | 55      |
| RM-28      | F:CTTCTTTCTGGCTTGGCTTGR:TAAGCTGGAGGAGGAGGTCA       | (TAC)9 | 161                | 56      |
| RM-31      | F:GGTTCAGATTTTCGTTCCGA R:GCGATAACATGATGCCGAAT      | (TAA)9 | 271                | 53      |
| RM-32      | F:GAACAGAACGGAGCTCCAAC<br>R:GGAAAGGAAAATTCGTGGAA   | (AAG)9 | 279                | 53      |
| RM-33      | F:CGTGCACCAAAAATTGGAGAT<br>R:CAAACCTGTGGTAATGCATCC | (TTC)9 | 182                | 53      |

|       |                                                    |        |     |    |
|-------|----------------------------------------------------|--------|-----|----|
| RM-37 | F:ACATGCATGCAAAACTCCCT R:TGCCTTCTCCAGAGCAGATT      | (ATA)9 | 242 | 55 |
| RM-38 | F:CGTGATGGCTATTGAAGGCT R:ATCCGTTTGATGTATGGGGA      | (TTC)9 | 206 | 54 |
| RM-39 | F:GCGGAGACGGTGTGTTTATT R:GCCTCCTTTTCCACCTTCTC      | (GGA)9 | 185 | 56 |
| RM-40 | F:AGGCTGAAGAGACGAGGTCA R:CTGGGAGTTCTGCCCAATTT      | (AGA)9 | 189 | 57 |
| RM-41 | F:GGAGAAAGCGAAGAACGAGA<br>R:CCCATCATCCTCCTCAATGT   | (AAC)9 | 196 | 54 |
| RM-42 | F:CGAGAGATTGATAGAGGGCG<br>R:AGTGAGAGAGCGACGGAGAG   | (CTT)9 | 269 | 57 |
| RM-44 | F:AACCAATTGGCAAAGAGTGG<br>R:AAAAATTTGGTCAAACGGAAA  | (AAG)9 | 278 | 51 |
| RM-45 | F:GGTTCCAAAGTTCGACAAA R:TTACATGACCTTCCCCAAA        | (GTT)9 | 204 | 53 |
| RM-47 | F:TGTTTGGAAACATGGGAAAAA<br>R:CGCAAACCTTATGGAATGCAA | (AAG)9 | 270 | 51 |
| RM-48 | F:TCGAACAAAACATCCGTCAA<br>R:GCATTTGGAATTTGCGTTTT   | (CAC)9 | 278 | 51 |
| RM-49 | F:TGGTGCTAGGAATGATTGGA<br>R:GAGCGAGTAATATCCAGCGG   | (AAG)9 | 257 | 54 |
| RM-51 | F:GGCGCAACTTAAGAAAACCA<br>R:CGAACGATCATAACACCCT    | (AGT)9 | 263 | 54 |
| RM-53 | F:TCTCGTTAATGAAGGCTGGC R:TCCCATCATCAAGCCATACA      | (ATT)9 | 193 | 54 |
| RM-54 | F:ATGTGTCGCTGAGTGAGTGG<br>R:AGTGACCTTTCGGGGTCTTT   | (TAT)9 | 203 | 57 |
| RM-57 | F:TTTCCGTGTTTGGGTTTCTC R:TCAGGTGAATCGGATGACAA      | (CTT)9 | 269 | 53 |
| RM-59 | F:GAAGATCGATCGAGGTCCAA<br>R:TAGTCACTGCCAAAACAGCG   | (TCT)9 | 158 | 55 |
| RM-60 | F:ATATGCCTATCTCCACCCCC R:AAATTGTCTTCGTTGCTGCC      | (CTC)9 | 210 | 55 |
| RM-61 | F:AGATGTAGGCGGGTGAATTG<br>R:ACAAGGCTACCCCTGTCTCA   | (TCC)9 | 192 | 57 |
| RM-63 | F:GTGCTAGCATTGCCAACAGAR:CCTAACCCGGAAAGGAAAAA       | (TCC)9 | 115 | 54 |
| RM-64 | F:CGGAACAAAAGAAGTGGGA<br>R:AAGATGGCATTGTCCGTTTC    | (AGG)8 | 106 | 53 |
| RM-68 | F:ACGAAGGCCCTACTTCCTGT R:GGGTGGTCATGTTCCATTTTC     | (AAG)8 | 209 | 56 |
| RM-69 | F:AGGAATCGGTCGGAAGAGTT R:ACGCCTTCATCTTCGTCATC      | (GAT)8 | 204 | 55 |
| RM-70 | F:CACACTGGATTGTGGTGGAG R:GAGGACAAATTTACGCCCAA      | (AAG)8 | 243 | 55 |
| RM-72 | F:GGAGGAAAGAAGGGAGTTGG<br>R:GAGGCGAAAGATAACCAGCAA  | (CAC)8 | 277 | 55 |
| RM-73 | F:ACGAGCCCCGACAATTGTAAC<br>R:CAGGAAGAAATGGAGGGTGA  | (TTC)8 | 231 | 55 |
| RM-74 | F:CACACACATCGGTTCTTCGT<br>R:CACAGCAAGAGGGTTGGTTT   | (ACA)8 | 236 | 56 |

---

|        |                                                   |        |     |    |
|--------|---------------------------------------------------|--------|-----|----|
| RM-75  | F:GTTCCCATAGCCCCAATGAT R:CGCAGGATTCGAGTGTAGGT     | (TTG)8 | 139 | 56 |
| RM-76  | F:TCTTCATAAACGCCACCACA R:AATGCACTCCCTCATTTTCG     | (CTC)8 | 108 | 53 |
| RM-77  | F:TTGGTCGCTTATTTGGAAGG R:TGGTTTTTACGTTGCCATT      | (TAG)8 | 214 | 52 |
| RM-81  | F:GGTTGGCAAACCTCCCTATCC<br>R:TTAGCGGGCAAGAAGAAAAA | (ATT)8 | 173 | 54 |
| RM-82  | F:CATAGGGCCCAATCCTTTTT R:GTGAAAGCTGTGGCCAAAAT     | (CCA)8 | 221 | 53 |
| RM-83  | F:CCTTCCCTTTCTTCCCAAAG R:AAGTCATGAGGGTCTCGTGG     | (CCA)8 | 157 | 55 |
| RM-84  | F:ATGGTTTCAAGGAGTGGACG<br>R:CGGAAAGAGAGAAGCACCAG  | (TGC)8 | 165 | 55 |
| RM-85  | F:CGGCTAGGTGTAAATGGGAA<br>R:AAAGGGGGAATTTGACAAAAA | (AAG)8 | 253 | 52 |
| RM-86  | F:GGTGATGGTTGTTGCTGTTG R:TGAAGCAAATGCCAGCTATG     | (TGC)8 | 277 | 54 |
| RM-87  | F:GGCAGAAAATACGCTTGCTC R:ACCGAGTTTTGTGGAGGTTG     | (CAG)8 | 192 | 55 |
| RM-88  | F:CATCCCCCTTCTCTTTCC R:AATTTGGTGGTGTGCTGACA       | (TTC)8 | 170 | 55 |
| RM-89  | F:ACACGAGAGGGTGACAGCTC R:CCCCTTTTCAATCCTCCAAT     | (TAC)8 | 276 | 56 |
| RM-91  | F:GCATGACAAAAAGGGAATCG<br>R:TTAGCTAGGCTGGTGGAGGA  | (TAG)8 | 185 | 55 |
| RM-93  | F:TGTGTGGCTCACATTTTCA<br>R:TGGTGGATATTTACAAACATGA | (AGT)8 | 159 | 52 |
| RM-94  | F:ATCCTTTGAGGGGAAGGAGA R:CAGCCCAAATCCTACTCAGC     | (TTC)8 | 250 | 56 |
| RM-95  | F:CAAGGGTTACCAAACACTGC R:AAGGGGATCCGTTTAATTCG     | (AAG)8 | 220 | 53 |
| RM-96  | F:CCTCCCAATTGACTGACGAT R:TGACGTGATGTTGCATTTTG     | (CCA)8 | 280 | 53 |
| RM-97  | F:TAAAAACAAAACCGCGCAAT<br>R:AACATCCCTAACGGTATGCG  | (AAT)8 | 239 | 53 |
| RM-98  | F:CTCCATTTGCCTTTTTCTCG R:AAAGCACAGGAGGGTGAAGA     | (ATC)8 | 233 | 54 |
| RM-99  | F:GCAAGAAAAGCCCTGAGAAA<br>R:TCTAGCATTGGGGATGAAGG  | (CTT)8 | 138 | 54 |
| RM-100 | F:TAGCCCAATCGTCTCCAATC R:ACTCTCCCTCAGTTGCCTCA     | (GGA)8 | 257 | 56 |

---
